# Supplementary material for: Organic and Elemental Carbon in the Urban Background in an Eastern Mediterranean City
Source: MDPI journal article supplement (doi:10.3390/atmos13020197), 2022-01-26
Supplement: s1 [file s1]

Archive with 1 entries (1 files):
- atmosphere-1515736-supplementary.pdf
